# Supplementary material
Source: HighWire-hosted journal article supplement (https://fn.bmj.com/content/104/3/F333)
Supplement: inline-supplementary-material-2 [file inline-supplementary-material-2.pdf]

## APPENDIX B

**Table A.** Risk of bias assessment of observational studies using Newcastle-Ottawa Quality Assessment Scale for Cohort Studies

| Reference  | Selection                            |                                 |                           |                                 | Comparability of cohorts (matched for)               | Outcome               |                                                     |                    | Total score (max=9) |
|------------|--------------------------------------|---------------------------------|---------------------------|---------------------------------|------------------------------------------------------|-----------------------|-----------------------------------------------------|--------------------|---------------------|
|            | Representativeness of exposed cohort | Selection of non-exposed cohort | Ascertainment of exposure | Outcome not present at baseline |                                                      | Assessment of outcome | Sufficient follow-up duration                       | Adequate follow-up |                     |
| Singh[18]  | *                                    | *                               | -                         | -                               | -                                                    | -                     | -                                                   | -                  | 2                   |
| Thoene[21] | *                                    | -                               | *                         | -                               | ** (estimated gestational age at birth, birthweight) | *                     | -<br>(not applicable in retrospective chart review) | *                  | 6                   |
